# Supplementary material for: Induction of natural killer antibody-dependent cell cytotoxicity and of clinical activity of cetuximab plus avelumab in non-small cell lung cancer
Source: PubMed Central journal article supplement — ESMO Open. 2020 Sep 10;5(5):e000753. doi: 10.1136/esmoopen-2020-000753 (PMC7484864; doi:10.1136/esmoopen-2020-000753), 2020-09-10
Supplement: esmoopen-2020-000753supp001.pdf [file esmoopen-2020-000753supp001.pdf]

Supplementary Table 1

| Cell line | Histology               | Genomic profile                                                    | EGFR<br>Normalized MFI<br>(% of positive<br>cells) | PD-L1<br>Normalized MFI<br>(% of positive<br>cells) | MHC-I<br>Normalized MFI<br>(% of positive<br>cells) |
|-----------|-------------------------|--------------------------------------------------------------------|----------------------------------------------------|-----------------------------------------------------|-----------------------------------------------------|
| H460      | Adenocarcinoma          | KRAS (Gln61His)<br>STK11 (Gln37Ter)<br>PIK3CA (Glu545Lys)          | 80<br>(75%)                                        | 90<br>(85%)                                         | 10<br>(7%)                                          |
| A549      | Adenocarcinoma          | KRAS (Gly12Ser)<br>STK11 (Gln37Ter)                                | 30<br>(55%)                                        | 65<br>(94%)                                         | 20<br>(23%)                                         |
| H1299     | Adenocarcinoma          | TP53 del<br>NRAS (missense)                                        | 80<br>(90%)                                        | 90<br>(85%)                                         | 5<br>(3%)                                           |
| PC9       | Adenocarcinoma          | EGFR<br>(Glu746_Ala750del)                                         | 70<br>(99%)                                        | 60<br>(80%)                                         | 30<br>(78%)                                         |
| H1975     | Adenocarcinoma          | EGFR (Thr790Met<br>and Leu858Arg)<br>TP53 (Arg273His)              | 80<br>(98%)                                        | 50<br>(68%)                                         | 20<br>(21%)                                         |
| HCC827    | Adenocarcinoma          | EGFR<br>(Glu746_Ala750del)                                         | 85<br>(100%)                                       | 60<br>(84%)                                         | 40<br>(28%)                                         |
| H441      | Adenocarcinoma          | KRAS (Gly12Val)                                                    | 75 (80%)                                           | 70 (73%)                                            | 40 (50%)                                            |
| CALU-3    | Adenocarcinoma          | TP53 (Met237Ile)                                                   | 80 (90%)                                           | 30 (35%)                                            | 30 (25%)                                            |
| Calu1     | Squamous<br>carcinoma   | KRAS (Gly12Cys)                                                    | 100 (95%)                                          | 90 (95%)                                            | 40 (50%)                                            |
| H157      | Squamous<br>carcinoma   | KRAS (Gly12Arg)<br>TP53 (Arg306Ter)                                | 90 (99%)                                           | 70 (80%)                                            | 30 (35%)                                            |
| HCC95     | Squamous<br>carcinoma   | Wild Type                                                          | 10 (15%)                                           | 40 (45%)                                            | 20 (25%)                                            |
| H82       | Small cell<br>carcinoma | TP53 (Thr125Thr)                                                   | 8 (11%)                                            | 50 (65%)                                            | 10 (15%)                                            |
| H69       | Small cell<br>carcinoma | PIK3CA<br>(Gly106_Arg108del)<br>RB1(Glu748Ter)<br>TP53 (Glu171Ter) | 12 (20%)                                           | 30 (35%)                                            | 20 (30%)                                            |

Flow cytometric analysis for EGFR, PD-L1 and MHC-I expression on a panel of lung cancer cell lines, including adenocarcinoma, squamous carcinoma and small cell carcinoma cells. Normalized mean fluorescence intensities (MFI) values are presented along with % of positive cells.
