# Supplementary material for: Induction of natural killer antibody-dependent cell cytotoxicity and of clinical activity of cetuximab plus avelumab in non-small cell lung cancer
Source: PubMed Central journal article supplement — ESMO Open. 2020 Sep 10;5(5):e000753. doi: 10.1136/esmoopen-2020-000753 (PMC7484864; doi:10.1136/esmoopen-2020-000753), 2020-09-10
Supplement: esmoopen-2020-000753supp002.pdf [file esmoopen-2020-000753supp002.pdf]

**Supplementary Table 2**

| Cell line | CI at ED50 | CI at ED75 | CI at ED90 |
|-----------|------------|------------|------------|
| H460      | 0.01       | 0.05       | 0.07       |
| A549      | 0.39       | 0.50       | 0.80       |
| H1299     | 0.01       | 0.03       | 0.03       |
| PC9       | 0.85       | 0.70       | 0.80       |
| H1975     | 0.05       | 0.04       | 0.08       |
| HCT827    | 0.04       | 0.05       | 0.08       |
| H441      | 0.89       | 0.90       | 1.00       |
| CALU-3    | 0.70       | 0.80       | 0.70       |
| Calu1     | 0.02       | 0.04       | 0.90       |
| H157      | 0.07       | 0.10       | 0.90       |
| H209      | 1.15       | 1.50       | 1.50       |
| H82       | 1.40       | 2.00       | 2.00       |
| H69       | 1.70       | 2.00       | 2.00       |

Combination Index (CI) for avelumab and cetuximab-induced ADCC in indicated cell lines, calculated by Chou and Talalay method. CI at effect dose 50 (ED50), ED75, ED90 of each combination are presented. CI > 1 denotes antagonism;  $1 < CI < 0.7$  denotes slight synergism;  $0.3 < CI < 0.7$  denotes synergism; CI < 0.3 denotes strong synergism.

Results are the median of 3 independent experiments, each done in 8 replicate wells for experimental point.
